# Supplementary material for: Higher mitochondrial DNA copy number is associated with metformin-induced weight loss
Source: PubMed Central journal article supplement (PMC9938854; doi:10.1038/s43856-023-00258-0), 2023-02-18
Supplement: 43856_2023_258_MOESM3_ESM.pdf [file 43856_2023_258_MOESM3_ESM.pdf]

## **Description of Additional Supplementary Files**

**File Name:** Supplementary Data 1

**Description:** Source data for Figure 1
